# Supplementary material for: The Potential Functional Roles of NME1 Histidine Kinase Activity in Neuroblastoma Pathogenesis
Source: MDPI journal article supplement (doi:10.3390/ijms21093319), 2020-05-07
Supplement: s1 [file s1]

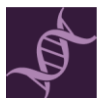

## Supplementary Data 1

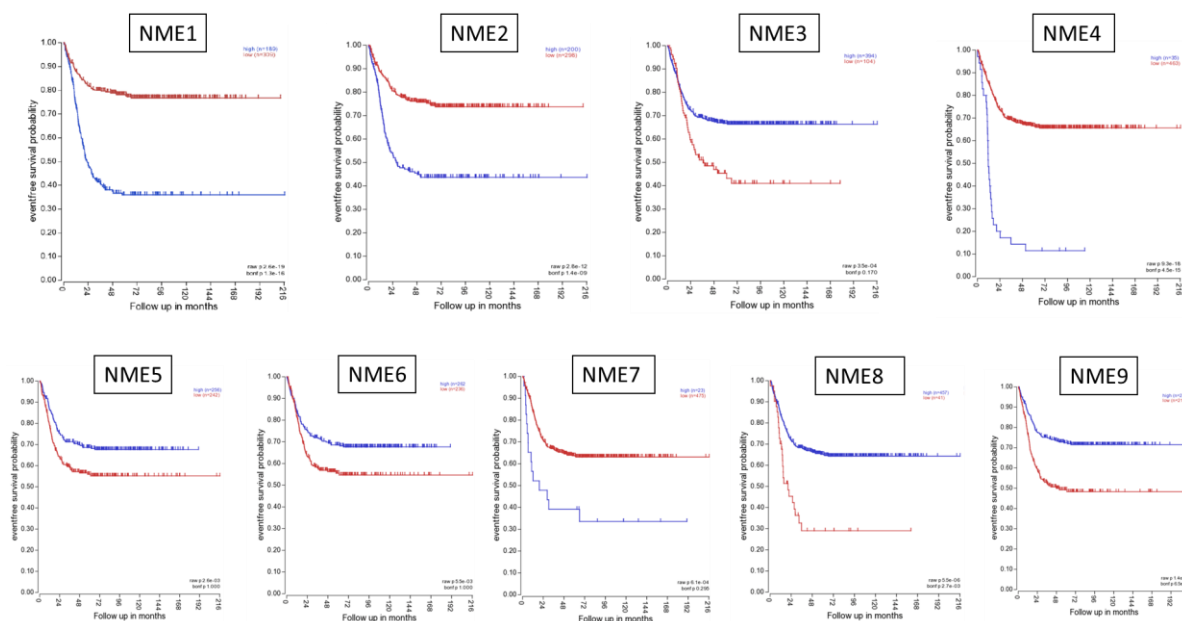

Using R2 Genomics Analysis and Visualization Platform, neuroblastoma patients were divided into high (blue) and low (red) genes expression groups for each of the nine *NME* family members (*NME1-9*) and survival curves were generated. Event-free survival (EFS) are shown with patient numbers in parentheses.

## Supplementary Data 2

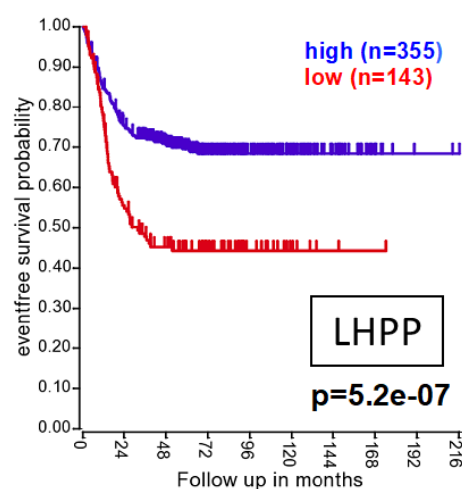

Using R2 Genomics Analysis and Visualization Platform, neuroblastoma patients were divided into high (blue) and low (red) LHPP gene expression groups and survival curves were generated. Event-free survival (EFS) are shown with patient numbers in parentheses.

**Supplementary Data 3**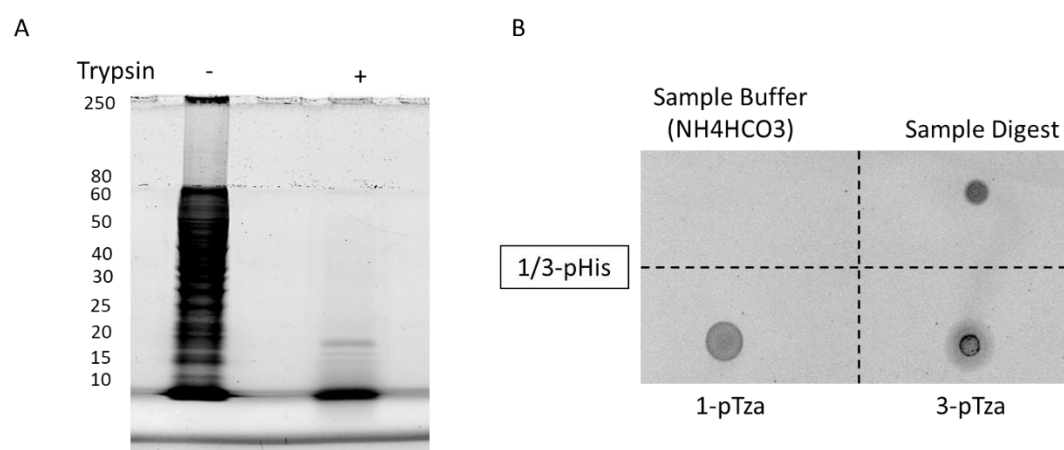

(a) Coomassie staining (b) Dot-blot stained with 1/3-pHis mAbs. Sample digest from SK-N-BE(2) orthotopic xenograft tumor (8 µg). 1-pTza and 3-pTza peptides (50 ng).

**Supplementary Data 4**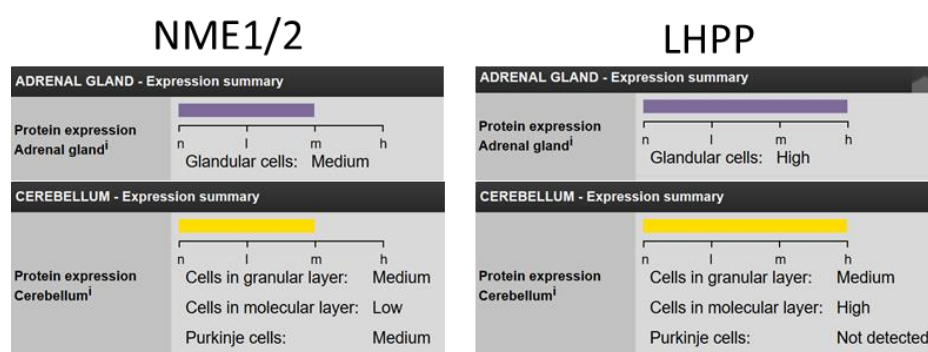

Protein expression range per tissue specificity available from <http://www.proteinatlas.org>
